# Supplementary material
Source: ML conference proceedings conference paper supplement (https://proceedings.neurips.cc/paper_files/paper/2011/hash/d56b9fc4b0f1be8871f5e1c40c0067e7-Abstract.html)
Supplement: Supplementary file 1 [file d56b9fc4b0f1be8871f5e1c40c0067e7-Supplemental.zip]

---

# Committing Bandits (Supplementary Material)

---

## 1 Relevant policies and results

### 1.1 Allocation policies:

**Uniform allocation (Unif):** Plays all arms in the round robin fashion. Formally, for each time  $t = 1, 2, \dots$ , set  $I_t = t \bmod K$ .

**Upper Confidence Bound (UCB) [1]:** From time 1 to time  $K$ , pull each arm once. For time  $t = K + 1, K + 2, \dots$ , pull the arm  $I_t$  such that

$$I_t = \arg \max_{1 \leq i \leq K} \left( \hat{\theta}_{i, T_i(t-1)} + \sqrt{\frac{2 \ln(t-1)}{T_i(t-1)}} \right),$$

where  $\hat{\theta}_{i, T_i(t-1)}$  is the empirical average of rewards associated with arm  $i$  so far, i.e.,

$$\hat{\theta}_{i, T_i(t-1)} = \frac{1}{T_i(t-1)} \sum_{s=1}^{T_i(t-1)} X_{i,s}. \quad (1)$$

### 1.2 Recommendation policies:

**Empirical Distribution of Plays (EDP):** Recommend arm  $i$  with probability  $T_i(n)/n$ . That is,

$$\mathbb{P}(J_n = i) = \frac{T_i(n)}{n}.$$

**Empirical Best Arm (EBA):** Recommend the arm which achieves maximum empirical average of rewards so far, i.e.,

$$J_n \in \arg \max_{1 \leq i \leq K} \hat{\theta}_{i, T_i(n)},$$

where  $\hat{\theta}_{i, T_i(n)}$  is defined in (1).

**Most Played Arm (MPA):** Recommend the most played arm, i.e.,

$$J_n \in \arg \max_{1 \leq i \leq K} T_i(n).$$

### 1.3 Known results

First, it is easy to see that  $\mathbb{E}[R_n] \leq \theta^* n$  for any allocation policy.

**Result 1** (Distribution-dependent [5]). *For any allocation policy, and for any set of reward distributions such that their parameters  $\theta_i$  are not all equal, there exists an ordering of  $(\theta_1, \dots, \theta_K)$  such that*

$$\mathbb{E}[R_n] \geq \left( \sum_{i \neq i^*} \frac{\Delta_i}{D(p_i \| p^*)} + o(1) \right) \ln n,$$

where  $D(p_i \| p^*) = p_i \log \frac{p_i}{p^*} + p^* \log \frac{p^*}{p_i}$  is the Kullback-Leibler divergence between two Bernoulli reward distributions  $p_i$  (of arm  $i$ ) and  $p^*$  (of the optimal arm), and  $o(1) \rightarrow 0$  as  $n \rightarrow \infty$ .

**Result 2** (Distribution-free [6]). *There exist positive constants  $c$  and  $N_0$  such that for any allocation policy, there exists a set of Bernoulli reward distributions such that*

$$\mathbb{E}[R_n] \geq cK(\ln n - \ln K), \quad \forall n \geq N_0.$$

**Result 3** (Distribution-dependent [3]). *For any pair of allocation and recommendation policies, if the allocation policy can achieve an upper-bound such that for all (Bernoulli) reward distributions  $\theta_1, \dots, \theta_K$ , there exists a constant  $C \geq 0$  with*

$$\mathbb{E}[R_n] \leq Cf(n),$$

*then, for all sets of  $K \geq 3$  Bernoulli reward distributions, with parameters  $\theta_i$  that are all distinct and all different from 1, there exists an ordering  $(\theta_1, \dots, \theta_K)$  such that*

$$\mathbb{E}[r_n] \geq \frac{\Delta}{2} e^{-Df(n)},$$

where  $D$  is a constant which can be calculated in closed form from  $C$ , and  $\theta_1, \dots, \theta_K$ .

In particular, since  $\mathbb{E}[R_n] \leq \theta^* n$  for any allocation policy, there exists a constant  $\xi$  depending only on  $\theta_1, \dots, \theta_K$  such that  $\mathbb{E}[r_n] \geq (\Delta/2)e^{-\xi n}$ .

**Result 4** (Distribution-free [3]). *For any pair of allocation policy and any recommendation policy, there exists a set of Bernoulli reward distributions such that*

$$\mathbb{E}[r_n] \geq \frac{1}{20} \sqrt{\frac{K}{n}}.$$

**Result 5** (Distribution-dependent [1]). *For the UCB allocation algorithm,*

$$\mathbb{E}_{UCB}[R_n] \leq \left( \sum_{i: \Delta_i > 0} \frac{8}{\Delta_i} + o(1) \right) \ln n,$$

where  $o(1) \rightarrow 0$  as  $n \rightarrow \infty$ . Thus, by Result 3, for UCB together with any recommendation policy, there exists a constant  $\rho$  such that  $\mathbb{E}[r_n] \geq (\Delta/2)n^{-\rho}$ .

**Result 6** (Distribution-dependent [3]). *Upper-bounds on simple regret:*

1. *For the pair [Unif, EBA],  $\mathbb{E}[r_n] \leq \sum_{i \neq i^*} \Delta_i e^{-\Delta_i^2 \lfloor n/K \rfloor}$ , for all  $n \geq K$ .*
2. *For the pair [UCB, MPA],  $\mathbb{E}[r_n] \leq \frac{K^3}{(n-K)^2}$ , for all  $n$  sufficiently large, such that  $n \geq K + 4K \ln n / \Delta^2$  and  $n \geq K(K+2)$ .*

## 2 Theorem 1 and its proof

**Theorem 1.** (1) *Distribution-dependent lower bound: In Regime 1, for any algorithm, and any set of  $K \geq 3$  Bernoulli reward distributions such that  $\theta_i$  are all distinct and all different from 1, there exists an ordering  $(\theta_1, \dots, \theta_K)$  such that*

$$\mathbb{E}[\text{Reg}] \geq \left( \max \left\{ \frac{(1-\gamma)\theta^*}{\xi}, \sum_{i \neq i^*} \frac{\Delta_i}{D(p_i \| p^*)} \right\} + o(1) \right) \frac{\ln T}{T},$$

where  $o(1) \rightarrow 0$  as  $T \rightarrow \infty$ , and  $\xi$  is the constant discussed in Result 3.

(2) *Distribution-free lower bound: Also, for any algorithm in Regime 1, there exists a set of Bernoulli reward distributions such that*

$$\mathbb{E}[\text{Reg}] \geq cK \left( 1 - \frac{\ln K}{\ln T} \right) \frac{\ln T}{T},$$

where  $c$  is the constant in Result 2.

*Proof.* We first derive the distribution-dependent lower-bound. Combining two lower bounds in Results 1 and 3 yields that

$$\begin{aligned}\mathbb{E}[\text{Reg}] &\geq \frac{\gamma c_1 \ln N}{T} + \frac{T-N}{T} c_2 e^{-c_3 N} + \frac{(1-\gamma)N\theta^*}{T} \\ &\geq \frac{1}{T} ((T-N)c_2 e^{-c_3 N} + (1-\gamma)N\theta^*),\end{aligned}$$

where  $c_1 = \sum_{i \neq i^*} \Delta_i / D(p_i \| p^*)$ ;  $c_2 = \Delta/2$ ; and  $c_3 = \xi$ . Now, let  $F_0(N) := (1-\gamma)N\theta^* + (T-N)c_2 e^{-c_3 N}$ . We have that  $F_0(N)$  is convex for  $N \in [0, T]$ , and

$$\frac{\partial F_0}{\partial N} = (1-\gamma)\theta^* - c_2 e^{-c_3 N} (1 + c_3(T-N)).$$

Thus defining  $N^*$  by  $\partial F_0(N^*)/\partial N = 0$ , we have:

$$\frac{(1-\gamma)\theta^*}{c_2 c_3} e^{c_3 N^*} + N^* - \frac{1}{c_3} = T. \quad (2)$$

With  $T$  going to infinity,  $N^*$  also goes to infinity, and hence, the first term in (2) dominates the second term if  $T$  is large enough. Therefore, for  $T$  large enough,

$$\begin{aligned}T &= \frac{(1-\gamma)\theta^*}{c_2 c_3} e^{c_3 N^*} + N^* - \frac{1}{c_3} \leq 2 \frac{(1-\gamma)\theta^*}{c_2 c_3} e^{c_3 N^*} \\ \text{i.e. } N^* &\geq \frac{1}{c_3} \left( \ln T - \ln \left( \frac{c_2 c_3}{2(1-\gamma)\theta^*} \right) \right).\end{aligned}$$

Substituting (2) into  $F_0$ , we obtain:

$$\begin{aligned}F_0(N) &\geq F_0(N^*) = (1-\gamma)\theta^* \left( N^* + \frac{1}{c_3} - \frac{c_2}{c_3(1-\gamma)\theta^*} e^{-c_3 N^*} \right) \\ &\geq (1-\gamma)\theta^* \left( \frac{\ln T}{c_3} - \frac{1}{c_3} \ln \left( \frac{c_2 c_3}{2(1-\gamma)\theta^*} \right) + \frac{1}{c_3} - \frac{2}{c_3^2 T} \right).\end{aligned}$$

Therefore,

$$\mathbb{E}[\text{Reg}] \geq \left( \frac{(1-\gamma)\theta^*}{\xi} + o(1) \right) \frac{\ln T}{T}, \quad (3)$$

where  $o(1) \rightarrow 0$  as  $T \rightarrow \infty$ .

Alternatively, we note that

$$\begin{aligned}\mathbb{E}[\text{Reg}] &= \gamma \frac{\mathbb{E}[R_N]}{T} + \frac{T-N}{T} \mathbb{E}[r_N] + (1-\gamma) \frac{N}{T} \theta^* \\ &\geq \frac{1}{T} (\mathbb{E}[R_N] + (T-N)\mathbb{E}[r_N]),\end{aligned}$$

since  $\mathbb{E}[R_N] \leq \theta^* N$ . But the right hand side is nothing but the regret of a particular strategy for the usual multi-armed bandit problem in  $T$  slots, and hence, it is further lower-bounded by Result 1. Thus,

$$\mathbb{E}[\text{Reg}] \geq \left( \sum_{i \neq i^*} \frac{\Delta_i}{D(p_i \| p^*)} + o(1) \right) \frac{\ln T}{T}. \quad (4)$$

Combining (3) and (4) yields the first bound.

Now, the distribution-free lower-bound can be obtained by noticing the following:

$$\begin{aligned}\mathbb{E}[\text{Reg}] &= \gamma \frac{\mathbb{E}[R_N]}{T} + \frac{T-N}{T} \mathbb{E}[r_N] + (1-\gamma) \frac{N}{T} \theta^* \\ &\geq \frac{1}{T} (\mathbb{E}[R_N] + (T-N)\mathbb{E}[r_N]),\end{aligned}$$

since  $\mathbb{E}[R_N] \leq \theta^* N$ . As we claimed before, the right hand side is nothing but the regret of a particular strategy for the usual multi-armed bandit problem in  $T$  slots, and hence, it is further lower-bounded by Result 2. Thus,  $\mathbb{E}[\text{Reg}] \geq cK/T(\ln T - \ln K)$ , for all  $T \geq N_0$ , where  $c$  and  $N_0$  are defined in Result 2. The result then follows.  $\square$

### 3 Theorem 2 and its proof

**Theorem 2.** *For the Non-adaptive Unif-EBA algorithm,*

$$\mathbb{E}[\text{Reg}] \leq \frac{K}{\Delta^2} \left( (1-\gamma)\theta^* + \frac{\gamma}{K} \sum_{i \neq i^*} \Delta_i + \frac{2\Delta^2}{\ln T} \right) \frac{\ln T}{T}.$$

*Proof.* The proof follows immediately from the known upper bound of the pair **[Unif, EBA]** (see [3]). Since the algorithm chooses uniformly each arm  $\lceil \ln T / \Delta^2 \rceil \leq 1 + \ln T / \Delta^2$  times, we have that

$$N \leq K \left( \frac{\ln T}{\Delta^2} + 1 \right), \quad \mathbb{E}[R_N] \leq \sum_{i \neq i^*} \Delta_i \left( \frac{\ln T}{\Delta^2} + 1 \right),$$

$$\mathbb{E}[r_N] \leq \sum_{i \neq i^*} \Delta_i e^{-\Delta_i^2 (\ln T / \Delta^2)} \leq \sum_{i \neq i^*} \Delta_i \frac{1}{T}.$$

Therefore,

$$\begin{aligned} \mathbb{E}[\text{Reg}] &= \frac{(1-\gamma)\theta^*}{T} N + \frac{\gamma}{T} \mathbb{E}[R_N] + \frac{T-N}{T} \mathbb{E}[r_N] \\ &\leq \frac{K}{\Delta^2} \left( (1-\gamma)\theta^* + \frac{\gamma}{K} \sum_{i \neq i^*} \Delta_i + \frac{\Delta^2}{\ln T} \left( (1-\gamma)\theta^* + \sum_{i \neq i^*} \frac{\Delta_i}{K} (\gamma+1) \right) \right) \frac{\ln T}{T} \\ &\leq \frac{K}{\Delta^2} \left( (1-\gamma)\theta^* + \frac{\gamma}{K} \sum_{i \neq i^*} \Delta_i + \frac{2\Delta^2}{\ln T} \right) \frac{\ln T}{T}, \end{aligned}$$

where the last inequality is due to the facts that  $0 < \theta^* \leq 1$  and  $0 < \Delta_i \leq 1$ .  $\square$

### 4 Theorem 3 and its proof

**Theorem 3.** (1) *Distribution-dependent lower bound: In Regime 2, for any algorithm, and any set of  $K \geq 3$  Bernoulli reward distribution such that  $\theta_i$  are all distinct and all different from 1, there exists an ordering  $(\theta_1, \dots, \theta_K)$  such that*

$$\mathbb{E}[\text{Reg}] \geq \left( \sum_{i \neq i^*} \frac{\Delta_i}{D(p_i \| p^*)} + o(1) \right) \frac{\ln T}{T},$$

where  $o(1) \rightarrow 0$  as  $T \rightarrow \infty$ .

(2) *Distribution-free lower bound: Also, for any algorithm in Regime 2, there exists a set of Bernoulli reward distributions such that*

$$\mathbb{E}[\text{Reg}] \geq cK \left( 1 - \frac{\ln K}{\ln T} \right) \frac{\ln T}{T},$$

where  $c$  is the constant from Result 2.

*Proof.* Given a fixed  $N$ , using the same technique as in the proof of Theorem 1, we note that:

$$\begin{aligned} \mathbb{E}[\text{Reg}|N] &= \gamma \frac{\mathbb{E}[R_N|N]}{T} + \frac{T-N}{T} \mathbb{E}[r_N|N] + (1-\gamma) \frac{N}{T} \theta^* \\ &\geq \frac{1}{T} (\mathbb{E}[R_N|N] + (T-N) \mathbb{E}[r_N|N]), \end{aligned}$$

since  $\mathbb{E}[R_N|N] \leq \theta^* N$ . However, any algorithm in Regime 2 is just a particular algorithm for the usual stochastic multi-armed bandit problem in  $T$  slots, and the right hand side is nothing but its regret. Therefore, applying the distribution-dependent lower bound in Result 1 and the distribution-free lower bound in Result 2, and taking the expectation over  $N$  yield the results.  $\square$

## 5 Theorem 4 and its proof

**Theorem 4.** For the SEC1 algorithm,

$$\mathbb{E}[\text{Reg}] \leq \frac{K}{\Delta^2} \left( (1-\gamma)\theta^* + \frac{\gamma}{K} \sum_{i \neq i^*} \Delta_i + b \right) \frac{\ln T}{T},$$

where

$$b = \left( 2 + \frac{\Delta^2(K+2)}{(1-e^{-\Delta^2/2})^2} \right) \frac{1}{\ln T} \rightarrow 0 \quad \text{as } T \rightarrow \infty.$$

*Proof.* Let  $P_k^*(n)$  denote the probability that the optimal arm  $i^*$  is kept until the end of  $n$ -th round, and  $P_r^*(n)$  denote the probability that  $i^*$  is rejected within the first  $n$  rounds. By definition,  $P_k^*(n) = 1 - P_r^*(n)$ .

For  $n \leq \alpha \ln T$ , using the “maximal” version of Chernoff-Hoeffding bound [4], we have that

$$P_r^*(n) = \mathbb{P} \left( \max_{1 \leq j \leq n} |S_j^{i^*} - j\theta^*| > \epsilon_1 \ln T \right) \leq 2e^{-2\epsilon_1^2(\ln T)^2/n} \leq 2e^{-2\epsilon_1^2(\ln T)/\alpha} = 2T^{-2}, \quad (5)$$

since  $\alpha = 1/\Delta^2$ ,  $\epsilon_1 = 1/\Delta$ .

For  $\alpha \ln T < n \leq T$ , using the union bound, Chernoff-Hoeffding bound [4] and (5), we have that:

$$\begin{aligned} P_r^*(n) &\leq \mathbb{P}(\text{“}i^* \text{ is rejected before } \alpha \ln T\text{”}) + \sum_{j=\alpha \ln T}^n \mathbb{P}(\text{“arm } i^* \text{ is rejected at time } j\text{”}) \\ &= P_r^*(\alpha \ln T) + \sum_{j=\alpha \ln T}^n \mathbb{P}(|S_j^{i^*} - j\theta^*| > \epsilon_2 j) \\ &\leq 2T^{-2} + \sum_{j=\alpha \ln T}^n 2e^{-2\epsilon_2^2 j} = 2T^{-2} + \frac{2e^{-2\epsilon_2^2 \alpha \ln T}}{1 - e^{-2\epsilon_2^2}} (1 - e^{-2\epsilon_2^2(n - \alpha \ln T)}) \\ &\leq 2T^{-2\epsilon_1^2/\alpha} + \frac{2T^{-2\epsilon_2^2 \alpha}}{1 - e^{-2\epsilon_2^2}} = 2T^{-2} + \frac{2T^{-1/2}}{1 - e^{-\Delta^2/2}}, \end{aligned} \quad (6)$$

since  $\epsilon_2 = \Delta/2$ .

Now, consider any arm  $i$  that is not optimal, and let  $P_k^i(n)$  denote the probability that arm  $i$  is kept until the end of  $n$ -th round. Let  $h(n)$  denote the rejecting threshold at time  $n$ , i.e.,  $h(n) = \epsilon_1 \ln T$  for  $n \leq \alpha \ln T$ , and  $h(n) = \epsilon_2 n$  for  $n > \alpha \ln T$ . Then for  $n > \alpha \ln T$ ,

$$\begin{aligned} P_k^i(n) &= \mathbb{P}(|S_j^i - j\theta^*| \leq h(j), 1 \leq j \leq n) \\ &\leq \mathbb{P}(|S_n^i - n\theta^*| \leq \epsilon_2 n) \\ &= \mathbb{P}(-\epsilon_2 n \leq S_n^i - n\Delta_i - n\theta_i \leq \epsilon_2 n) \\ &\leq \mathbb{P}(S_n^i - n\theta_i \geq n(\Delta_i - \epsilon_2)) \leq e^{-n\Delta^2/2}. \end{aligned}$$

Therefore, for  $n > \alpha \ln T$ , the probability that any suboptimal arm is kept until the end of  $n$ -th round at most  $(K-1)e^{-n\Delta^2/2}$ , and hence, the probability that all suboptimal arms are rejected within first  $n$  rounds is at least  $1 - (K-1)e^{-n\Delta^2/2}$ .

Let  $N^s$  denote the stopping time of the algorithm. Then, for  $n > \alpha \ln T$ ,

$$\mathbb{P}(N^s \leq n) \geq \mathbb{P}(\text{all suboptimal arms are rejected within first } n \text{ rounds}) \geq 1 - (K-1)e^{-n\Delta^2/2}.$$

$$\Rightarrow \mathbb{P}(N^s > n) \leq (K-1)e^{-n\Delta^2/2} \quad \text{for } n > \alpha \ln T.$$

And hence,

$$\begin{aligned}
\mathbb{E}[N^s] &= \sum_{1 \leq n \leq T} \mathbb{P}(N^s > n) \leq \alpha \ln T + \sum_{\alpha \ln T < n \leq T} (K-1)e^{-n\Delta^2/2} \\
&= \alpha \ln T + \frac{(K-1)T^{-\alpha\Delta^2/2}}{1 - e^{-\Delta^2/2}}(1 - e^{-T\Delta^2/2}) \\
&\leq \frac{\ln T}{\Delta^2} + \frac{(K-1)}{1 - e^{-\Delta^2/2}}T^{-1/2} \\
&\leq \frac{\ln T}{\Delta^2} \left(1 + \frac{\Delta^2(K-1)}{(1 - e^{-\Delta^2/2}) \ln T}\right). \tag{7}
\end{aligned}$$

Thus, the cumulative regret bound is:

$$\mathbb{E}[R_{N_s}] \leq \gamma \left( \sum_{i \neq i^*} \Delta_i \right) \frac{\ln T}{\Delta^2} \left(1 + \frac{\Delta^2(K-1)}{(1 - e^{-\Delta^2/2}) \ln T}\right). \tag{8}$$

Now, let us consider the simple regret:

$$\begin{aligned}
\mathbb{E}[r_{N_s}] &= \sum_{i \neq i^*} \Delta_i \mathbb{P}(\text{“arm } i \text{ is kept until the stopping time”}) \\
&= \sum_{i \neq i^*} \sum_{n=1}^T \Delta_i \mathbb{P}(\text{“arm } i \text{ is kept until } n”, N_s = n) \\
&\leq \sum_{i \neq i^*} \sum_{n=1}^T \Delta_i \mathbb{P}(\text{“arm } i \text{ is kept until } n”, \text{“arm } i^* \text{ is rejected before } n”) \\
&= \sum_{i \neq i^*} \sum_{n=1}^T \Delta_i \mathbb{P}(\text{“arm } i \text{ is kept until } n”) \times \mathbb{P}(\text{“arm } i^* \text{ is rejected before } n”). \\
&= \sum_{i \neq i^*} \Delta_i \sum_{n=1}^T P_k^i(n) P_r^*(n) \\
&= \sum_{i \neq i^*} \Delta_i \left( \sum_{1 \leq n \leq \alpha \ln T} P_k^i(n) P_r^*(n) + \sum_{\alpha \ln T < n \leq T} P_k^i(n) P_r^*(n) \right),
\end{aligned}$$

where the fourth equality is because **SEC1** makes decision on each arm independently. Then, applying (6) and (5) yields that

$$\begin{aligned}
\mathbb{E}[r] &\leq \sum_{i \neq i^*} \Delta_i \left( \sum_{1 \leq n \leq \alpha \ln T} 2T^{-2} + \sum_{\alpha \ln T < n \leq T} e^{-n\Delta^2/2} \left( T^{-2} + \frac{2T^{-1/2}}{1 - e^{-\Delta^2/2}} \right) \right) \\
&\leq \sum_{i \neq i^*} \Delta_i \left( 2\alpha(\ln T)T^{-2} + \frac{T^{-1/2}}{1 - e^{-\Delta^2/2}} \left( T^{-2} + \frac{2T^{-1/2}}{1 - e^{-\Delta^2/2}} \right) \right) \\
&\leq \left( \sum_{i \neq i^*} \Delta_i \right) \left( \frac{2}{\Delta^2} T^{-2+1/e} + \frac{T^{-5/2}}{1 - e^{-\Delta^2/2}} + \frac{2T^{-1}}{(1 - e^{-\Delta^2/2})^2} \right) \\
&\leq \left( \sum_{i \neq i^*} \Delta_i \right) \frac{1}{T(1 - e^{-\Delta^2/2})^2} \left( 3 + \frac{2(1 - e^{-\Delta^2/2})^2}{\Delta^2} \right), \tag{9}
\end{aligned}$$

where the third inequality is due to the fact that  $\ln x \leq x^{1/e}$  for all  $x > 0$ . Combining (7)-(9) yields that:

$$\begin{aligned}
\mathbb{E}[\text{Reg}] &\leq \frac{K \ln T}{\Delta^2 T} \left( (1-\gamma)\theta^* + \frac{\gamma}{K} \sum_{i \neq i^*} \Delta_i \right. \\
&\quad + \frac{\Delta^2}{(1-e^{-\Delta^2/2})^2 \ln T} \left[ (1-\gamma)\theta^*(K-1) \left( 1 - e^{-\Delta^2/2} \right) \right] \\
&\quad + \frac{\Delta^2}{(1-e^{-\Delta^2/2})^2 \ln T} \left[ \frac{\gamma(K-1)}{K} \left( \sum_{i \neq i^*} \Delta_i \right) \left( 1 - e^{-\Delta^2/2} \right) \right] \\
&\quad + \frac{\Delta^2}{(1-e^{-\Delta^2/2})^2 K \ln T} \left( \sum_{i \neq i^*} \Delta_i \right) \left[ 3 + \frac{2}{\Delta^2} \left( 1 - e^{-\Delta^2/2} \right)^2 \right] \Bigg) \\
&\leq \frac{K \ln T}{\Delta^2 T} \left( (1-\gamma)\theta^* + \frac{\gamma}{K} \sum_{i \neq i^*} \Delta_i \right. \\
&\quad + \frac{\Delta^2}{(1-e^{-\Delta^2/2})^2 \ln T} \left[ (K-1) + 3 + \frac{2}{\Delta^2} \left( 1 - e^{-\Delta^2/2} \right)^2 \right] \Bigg) \\
&= \frac{K \ln T}{\Delta^2 T} \left( (1-\gamma)\theta^* + \frac{\gamma}{K} \sum_{i \neq i^*} \Delta_i + \frac{1}{\ln T} \left[ 2 + \frac{\Delta^2(K+2)}{(1-e^{-\Delta^2/2})^2} \right] \right),
\end{aligned}$$

where the second inequality is due to the facts that  $0 < \theta^* \leq 1$ ,  $0 < \Delta_i \leq 1$ , and  $e^{-\Delta^2/2} \geq 0$ .  $\square$

## 6 Theorem 5 and its proof

**Theorem 5.** *For the SC-UCB algorithm,*

$$\mathbb{E}[\text{Reg}] \leq \sum_{i \neq i^*} \left( \frac{\gamma \Delta_i + (1-\gamma)\theta^*}{\Delta_i^2} \right) \frac{\ln(T \Delta_i^2)}{T} \left( 32 + \frac{\Delta_i^2 + 96}{\ln(T \Delta_i^2)} \right).$$

*Proof.* This proof is based on the proof of Theorem 3.1 in [2].

First, let  $N_e^i$  denote the number of time slots that arm  $i$  is chosen during experimentation phase (i.e., before commitment), and  $N_c^i$  denote the number of time slots that  $i$  is chosen during commitment phase (that is,  $N_c^j = 0$  if the algorithm does not commit to arm  $j$ ). Also, let  $N^i = N_e^i + N_c^i$  be the total number of time slots that the algorithm spent on arm  $i$ .

We then observe that in Regime 2, in any time slot *before* commitment, if the algorithm chooses a suboptimal arm  $i$ , then it suffers an expected loss  $\gamma \Delta_i + (1-\gamma)\theta^*$ ; otherwise, it suffers an expected loss  $(1-\gamma)\theta^*$  if it chooses  $i^*$ . Furthermore, in any time slot *after* commitment, if the algorithm commits to a suboptimal arm  $i$ , then it suffers an expected loss  $\Delta_i$ ; otherwise, it does not suffer any loss if committing to  $i^*$ .

Now, let us define  $\lambda = \sqrt{e/T}$ , let  $A$  be the set of arms  $i$  for which  $\Delta_i > \lambda$ , i.e.,  $A = \{i \in [K] : \Delta_i > \lambda\}$ . For any arm  $i \in A$ , its contributed regret is

$$\frac{(\gamma \Delta_i + (1-\gamma)\theta^*) N_e^i + \Delta_i N_c^i}{T} \leq (\gamma \Delta_i + (1-\gamma)\theta^*) \frac{N_e^i + N_c^i}{T} = (\gamma \Delta_i + (1-\gamma)\theta^*) \frac{N^i}{T}.$$

Following the steps in the proof of Theorem 3.1 in [2], one can show that the expected number of time slots that **SC-UCB** spent on arm  $i$  for  $i \in A$  is bounded by:

$$\mathbb{E}[N^i] \leq \left( 1 + \frac{32 \ln(T \Delta_i^2)}{\Delta_i^2} + \frac{96}{\Delta_i^2} \right), \quad i \in A.$$

Thus, the expected regret contributed by an arm  $i \in A$  is bounded by

$$\frac{\gamma\Delta_i + (1-\gamma)\theta^*}{T} \left( 1 + \frac{32 \ln(T\Delta_i^2)}{\Delta_i^2} + \frac{96}{\Delta_i^2} \right).$$

Next, for  $i \notin A$ , we have that  $N_e^i \leq 1 + 2 \ln(T\lambda^2)/\lambda^2$  under **SC-UCB**, since **SC-UCB** will stop when  $m = \lfloor \log_2(T/e)/2 \rfloor$ . Moreover,  $N_c^i$  is trivially bounded by  $T$ . Thus, the contributed regret of an arm  $i \notin A$  is bounded by

$$\frac{\gamma\Delta_i + (1-\gamma)\theta^*}{T} \left( \frac{2 \ln(T\lambda^2)}{\lambda^2} + 1 \right) + \Delta_i.$$

Therefore, the total regret bound would be

$$\begin{aligned} \mathbb{E}[\text{Reg}] &\leq \sum_{i:\Delta_i > \lambda} \frac{\gamma\Delta_i + (1-\gamma)\theta^*}{T} \left( 1 + \frac{32 \ln(T\Delta_i^2)}{\Delta_i^2} + \frac{96}{\Delta_i^2} \right) \\ &\quad + \sum_{i:\Delta_i \leq \lambda} \Delta_i + \frac{\gamma\Delta_i + (1-\gamma)\theta^*}{T} \left( 1 + \frac{2 \ln(T\lambda^2)}{\lambda^2} \right) \\ &\leq \sum_{i:\Delta_i > \lambda} \frac{\gamma\Delta_i + (1-\gamma)\theta^*}{T} \frac{\ln(T\Delta_i^2)}{\Delta_i^2} \left( 32 + \frac{\Delta_i^2}{\ln(T\Delta_i^2)} + \frac{96}{\ln(T\Delta_i^2)} \right) \\ &\quad + \sum_{i:\Delta_i \leq \lambda} \frac{\gamma\Delta_i + (1-\gamma)\theta^*}{T} \frac{\ln(T\Delta_i^2)}{\Delta_i^2} \left( 2 + \frac{\Delta_i^2}{\ln(T\Delta_i^2)} + \frac{T\Delta_i}{\gamma\Delta_i + (1-\gamma)\theta^*} \frac{\Delta_i^2}{\ln(T\Delta_i^2)} \right). \end{aligned}$$

Note that for  $\Delta_i \leq \lambda = \sqrt{e/T}$ ,  $T\Delta_i^2 \leq e$ . Moreover,  $\Delta_i \leq \gamma\Delta_i + (1-\gamma)\theta^*$ . Thus,

$$\begin{aligned} \mathbb{E}[\text{Reg}] &\leq \sum_{i:\Delta_i > \lambda} \frac{\gamma\Delta_i + (1-\gamma)\theta^*}{T} \frac{\ln(T\Delta_i^2)}{\Delta_i^2} \left( 32 + \frac{\Delta_i^2}{\ln(T\Delta_i^2)} + \frac{96}{\ln(T\Delta_i^2)} \right) \\ &\quad + \sum_{i:\Delta_i \leq \lambda} \frac{\gamma\Delta_i + (1-\gamma)\theta^*}{T} \frac{\ln(T\Delta_i^2)}{\Delta_i^2} \left( 2 + \frac{\Delta_i^2}{\ln(T\Delta_i^2)} + \frac{e}{\ln(T\Delta_i^2)} \right) \\ &\leq \sum_{i \neq i^*} \left( \frac{\gamma\Delta_i + (1-\gamma)\theta^*}{\Delta_i^2} \right) \frac{\ln(T\Delta_i^2)}{T} \left( 32 + \frac{\Delta_i^2 + 96}{\ln(T\Delta_i^2)} \right). \end{aligned}$$

□

## 7 Theorem 6 and its proof

**Theorem 6.** *The cumulative regret of **UCB-poly**( $\delta$ ) is upper-bounded by*

$$\mathbb{E}[R_n] \leq \left( \sum_{i:\Delta_i > 0} \frac{8}{\Delta_i} + o(1) \right) n^\delta,$$

where  $o(1) \rightarrow 0$  as  $n \rightarrow \infty$ . Moreover, the simple regret for the pair [**UCB-poly**( $\delta$ ), **EBA**] is upper-bounded by

$$\mathbb{E}[r_n] \leq \left( 2 \sum_{i \neq i^*} \Delta_i \right) e^{-\chi n^\delta},$$

where  $\chi = \min_i \frac{\sigma}{2} \Delta_i^2$ .

*Proof.* Following the steps in the proof of Theorem 1 in [1], we can easily show the following cumulative regret bound for **UCB-poly**( $\delta$ ):

$$\begin{aligned} \mathbb{E}_{\text{UCB-poly}}[T_i(n)] &\leq \left\lceil \frac{8n^\delta}{\Delta_i^2} \right\rceil + \sum_{t=1}^n \sum_{s=1}^t \sum_{s_i=1}^t 2e^{-4t^\delta} \leq \frac{8n^\delta}{\Delta_i^2} + 1 + 2 \sum_{t=1}^n t^2 e^{-4t^\delta} \\ &\leq \frac{8n^\delta}{\Delta_i^2} + 1 + 2A^\infty(\delta), \end{aligned}$$



where  $A^\infty(\delta) = \sum_{t=1}^\infty t^2 e^{-4t^\delta}$ . Since  $A^\infty(\delta)$  is finite for any fixed  $\delta > 0$ , the result is obtained.

In order to prove the simple regret bound for the pair **[UCB-poly( $\delta$ ), EBA]**, we need the following lemma.

**Lemma 1.** *There exists a positive constant  $\sigma$  such that under the **UCB-poly( $\delta$ )** policy, for any arm  $i$  and any  $n > K$ ,*

$$T_i(n) \geq \sigma n^\delta.$$

*Proof.* We first note that for any  $i$ ,  $T_i(n) \geq 1$  for any  $n > K$ , and  $T_i(n)$  is non-decreasing in  $n$ . Therefore, if such constant  $\sigma$  does not exist, it has to be the case in which there exists an arm  $j$  such that  $T_j(n)/n^\delta \rightarrow 0$  as  $n \rightarrow \infty$ , or  $T_j(n) \ll n^\delta$ . It is then elementary to prove that this cannot happen under the **UCB-poly( $\delta$ )** policy.  $\square$

Now we prove the simple regret bound the pair **[UCB-poly( $\delta$ ), EBA]**. Note that

$$\begin{aligned} \mathbb{E}[r_n] &= \mathbb{E}[\theta^* - \theta_{J_n}] = \mathbb{E}\left[\sum_{i \neq i^*} \Delta_i \mathbb{1}\{J_n = i\}\right] \\ &= \sum_{i \neq i^*} \Delta_i \mathbb{P}(J_n = i) \leq \sum_{i \neq i^*} \Delta_i \mathbb{P}\left(\hat{\theta}_{i, T_i(t)} \geq \hat{\theta}_{T^*(t)}^*\right). \end{aligned}$$

If  $\hat{\theta}_{i, T_i(t)} < \theta_i + \frac{\Delta_i}{2}$  and  $\hat{\theta}_{T^*(t)}^* > \theta^* - \frac{\Delta_i}{2}$ , then  $\hat{\theta}_{i, T_i(t)} < \hat{\theta}_{T^*(t)}^*$ . Thus,

$$\begin{aligned} \mathbb{P}\left(\hat{\theta}_{i, T_i(t)} \geq \hat{\theta}_{T^*(t)}^* \mid T_i(t), T^*(t)\right) &\leq \mathbb{P}\left(\hat{\theta}_{i, T_i(t)} \geq \theta_i + \frac{\Delta_i}{2}\right) + \mathbb{P}\left(\hat{\theta}_{T^*(t)}^* \leq \theta^* - \frac{\Delta_i}{2}\right) \\ &\leq \exp\left(-\frac{\Delta_i^2 T_i(t)}{2}\right) + \exp\left(-\frac{\Delta_i^2 T^*(t)}{2}\right) \\ &\leq 2 \exp\left(-\frac{\sigma \Delta_i^2}{2} n^\delta\right), \end{aligned}$$

where the second inequality is due to the Chernoff-Hoeffding bound [4], and the third inequality is due to Lemma 1. Taking the expectation over  $(T_i(t), T^*(t))$  yields that

$$\mathbb{P}\left(\hat{\theta}_{i, T_i(t)} \geq \hat{\theta}_{T^*(t)}^*\right) \leq 2 \exp\left(-\frac{\sigma \Delta_i^2}{2} n^\delta\right).$$

Therefore,

$$\mathbb{E}[r_n] \leq 2 \sum_{i \neq i^*} \Delta_i \exp\left(-\frac{\sigma \Delta_i^2}{2} n^\delta\right) \leq \left(2 \sum_{i \neq i^*} \Delta_i\right) e^{-\chi n^\delta},$$

where  $\chi = \min_i \frac{\sigma}{2} \Delta_i^2$ .  $\square$

## 8 Theorem 7 and its proof

**Theorem 7.** *Suppose  $T \equiv T(N)$  is a continuous function of  $N$  such that  $\lim_{N \rightarrow \infty} \frac{\ln(\ln(T(N) - N))}{\ln N}$  exists. Consider the function*

$$F_\delta(N) := C_1 \frac{N^\delta}{T(N)} + \frac{T(N) - N}{T(N)} C_2 e^{-C_3 N^\delta}, \quad 0 \leq \delta \leq 1,$$

where  $C_1, C_2$ , and  $C_3$  are positive constants, and let

$$\delta^* := \lim_{N \rightarrow \infty} \frac{\ln(\ln(T(N) - N))}{\ln N}, \text{ projected on } [0, 1].$$

Then, for any  $\delta \in [0, 1]$ ,  $\limsup_{N \rightarrow \infty} \frac{F_{\delta^*}(N)}{F_\delta(N)} \leq 1$ .

The above theorem show that in the limit, as  $T$  and  $N$  increase to infinity, the “optimal” value of  $\delta$  can be chosen as  $\lim_{N \rightarrow \infty} \ln(\ln(T(N) - N)) / \ln N$  if that limit exists. For examples:

- If  $T(N) \doteq \Omega(e^N)$ , then we should choose  $\delta = 1$ . The corresponding scheme is **[Unif, EBA]**, i.e., to explore uniformly during the experimentation phase, and then commit to the empirical best arm.
- If  $T(N) \doteq \Theta(e^{N^\alpha})$  ( $0 < \alpha < 1$ ), then we should choose  $\delta = \alpha$ . The corresponding scheme is **[UCB-poly( $\alpha$ ), EBA]**, i.e., to use the UCB-poly( $\alpha$ ) algorithm during the experimentation phase, and then commit to the empirical best arm.
- If  $T(N) \doteq \mathcal{O}(e^{\ln N})$ , then we should choose  $\delta = 0$ . The corresponding scheme is **[UCB, MPA]**, i.e., to use the standard UCB algorithm during the experimentation phase, and then commit to the most played arm. Note that as  $\delta = 0$ , we cannot get the cumulative regret bound of  $N^\delta = N^0 = \text{constant}$ , since  $\ln N$  is a lower bound (and the standard UCB algorithm achieves that).

*Proof.* For a fixed  $N$ , let us define an auxiliary variable  $y = N^\delta$  for  $\delta \in [0, 1]$  and define

$$F(y) := C_1 \frac{y}{T(N)} + \frac{T(N) - N}{T(N)} C_2 e^{-C_3 y}, \quad 1 \leq y \leq N.$$

Note that  $F(y)$  is convex for  $y \in [1, N]$ . Therefore, it achieves a unique minimum at

$$y_N^* = \frac{1}{C_3} \ln \left( \frac{C_2 C_3 (T(N) - N)}{C_1} \right), \text{ projected on } [1, N],$$

or

$$\delta_N^* = \frac{1}{\ln N} \left( \ln \left( \ln(T(N) - N) + \ln \left( \frac{C_2 C_3}{C_1} \right) \right) - \ln C_3 \right), \text{ projected on } [0, 1]. \quad (10)$$

In other words, for any  $\delta \in [0, 1]$ , we have that

$$F_{\delta_N^*}(N) \leq F_\delta(N) \quad \text{or} \quad \frac{F_{\delta_N^*}(N)}{F_\delta(N)} \leq 1 \quad \text{for all } N.$$

Also, taking the limit of (10) as  $N$  goes to infinity yields that

$$\lim_{N \rightarrow \infty} \delta_N^* = \lim_{N \rightarrow \infty} \frac{\ln(\ln(T(N) - N))}{\ln N} = \delta^*.$$

Now, suppose there exists some  $\delta \in [0, 1]$  such that

$$\limsup_{N \rightarrow \infty} \frac{F_{\delta^*}(N)}{F_\delta(N)} = 1 + \epsilon > 1, \quad \text{for some } \epsilon > 0.$$

Then there exists an increasing subsequence  $\{n_0, n_1, n_2, \dots\}$  such that

$$F_{\delta^*}(n_k) = (1 + \epsilon) F_\delta(n_k) \geq (1 + \epsilon) F_{\delta_{n_k}^*}(n_k) > F_{\delta_{n_k}^*}^*(n_k), \quad \text{for all } k.$$

This leads to a contradiction of the fact that  $\lim_{N \rightarrow \infty} \delta_N^* = \delta^*$ . Therefore,

$$\limsup_{N \rightarrow \infty} \frac{F_{\delta^*}(N)}{F_\delta(N)} \leq 1, \quad \text{for any } \delta \in [0, 1].$$

□

## 9 Additional simulation results

In this section, we present some additional numerical results on the performance of **Non-adaptive Unif-EBA**, **SEC1**, **SEC2**, and **SC-UCB** algorithms with different sets of parameters.

We first recall Figure 1 which shows the regrets of the above algorithms for various values of  $T$  (in

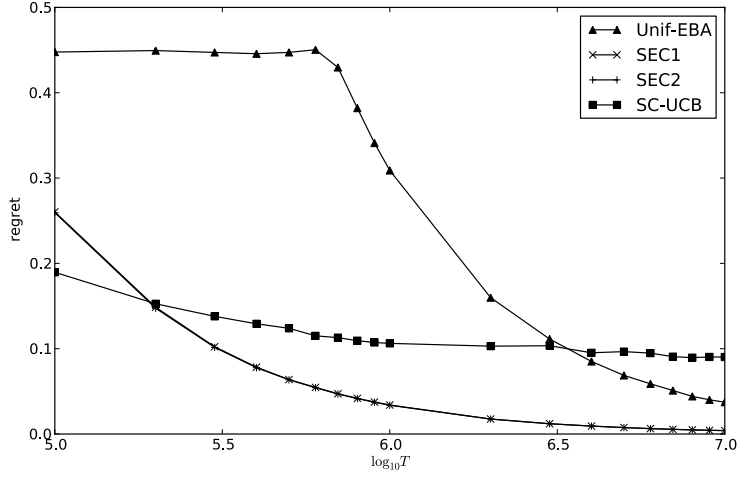

Figure 1: Numerical performances where  $K = 20$ ,  $\gamma = 0.75$ , and  $\Delta = 0.02$

logarithmic scale) with parameters  $K = 20$ ,  $\gamma = 0.75$ , and  $\Delta = 0.02$ . We can see that the performances of **SEC1** and **SEC2** are nearly identical, which suggests that the requirement of knowing  $\theta^*$  in **SEC1** can be relaxed. Moreover, **SEC1** (or equivalently, **SEC2**) performs much better than **Non-adaptive Unif-EBA** due to its adaptive nature. Particularly, the performance of **Non-adaptive Unif-EBA** is quite poor when the experimentation deadline is roughly equal to  $T$ , since the algorithm does not commit before the experimentation deadline. Finally, **SC-UCB** performs not as well as the others when  $T$  is large, but this algorithm does not require us to know  $\Delta$ , and thus suffers a performance loss due to the additional effort required to estimate  $\Delta$ .

Next, we keep  $K = 20$ ,  $\gamma = 0.75$ , and decrease the value of  $\Delta$ . Figures 2 and 3 show the per-

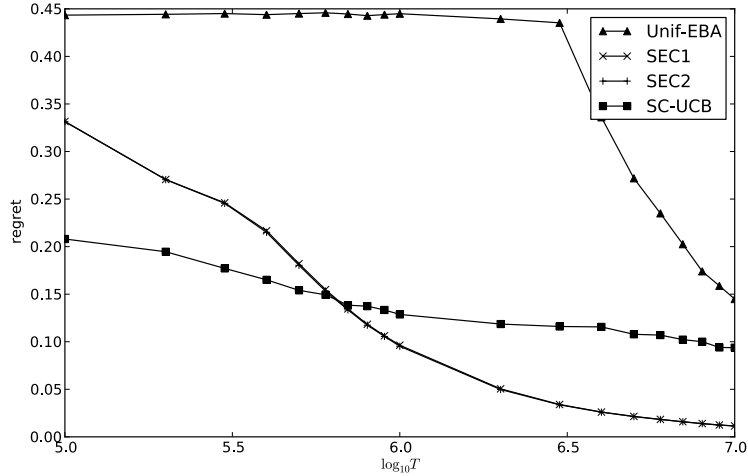

Figure 2: Numerical performances where  $K = 20$ ,  $\gamma = 0.75$ , and  $\Delta = 0.01$

formances of these algorithms for  $\Delta = 0.01$  and  $\Delta = 0.005$ , respectively. The decrease of  $\Delta$  affects all of the algorithms, but it seems to have more effect on **SEC1** and **SEC2** than **SC-UCB**, and particularly has a huge effect on the performance of **Non-adaptive Unif-EBA**. The reason is that the value of  $\Delta$  is directly embedded in decision thresholds of **SEC1**, **SEC2** and **Non-adaptive Unif-EBA**, which is not the case for **SC-UCB**.

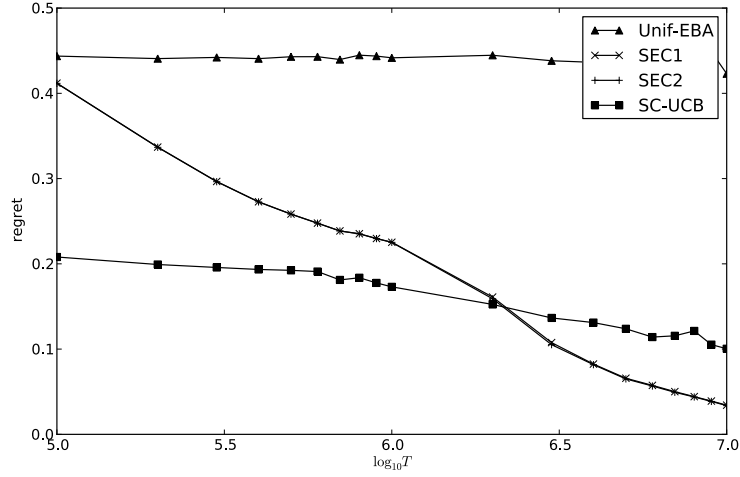

Figure 3: Numerical performances where  $K = 20$ ,  $\gamma = 0.75$ , and  $\Delta = 0.005$

We then investigate the effect of changing  $\gamma$ . Figure 4 shows the result for  $K = 20$ ,  $\gamma = 0.9$ , and

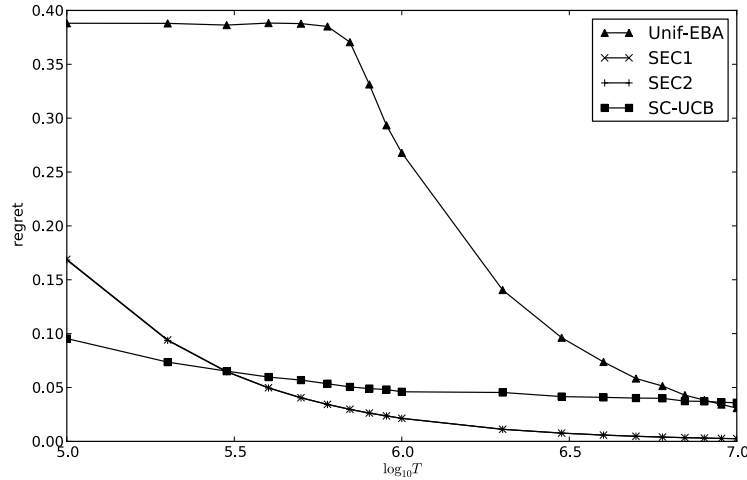

Figure 4: Numerical performances where  $K = 20$ ,  $\gamma = 0.9$ , and  $\Delta = 0.02$

$\Delta = 0.02$ . As expected, the regrets of all algorithms in this case are smaller than the ones in the case of  $\gamma = 0.75$  (Figure 1).

Finally, we keep  $\gamma = 0.9$ ,  $\Delta = 0.02$ , and increase  $K$ . Figures 5 and 6 shows the results for  $K = 50$  and  $K = 100$ , respectively. Again, we see that the increase of  $K$  affects all of the algorithms, but it has more effect on **Non-adaptive Unif-EBA**, **SEC1**, and **SEC2** than **SC-UCB**.

## References

- [1] P. Auer, N. Cesa-Bianchi, and P. Fischer. Finite-time analysis of the multi-armed bandit problem. *Machine Learning Journal*, 47(2-3):235–256, 2002.
- [2] P. Auer and R. Ortner. UCB revisited: Improved regret bounds for the stochastic multi-armed bandit problem. *Periodica Mathematica Hungarica*, 61(1-2):55–65, 2010.

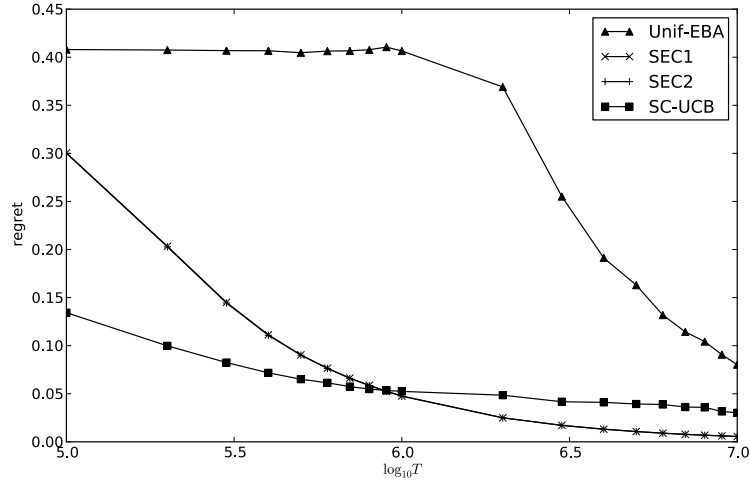

Figure 5: Numerical performances where  $K = 50$ ,  $\gamma = 0.90$ , and  $\Delta = 0.02$

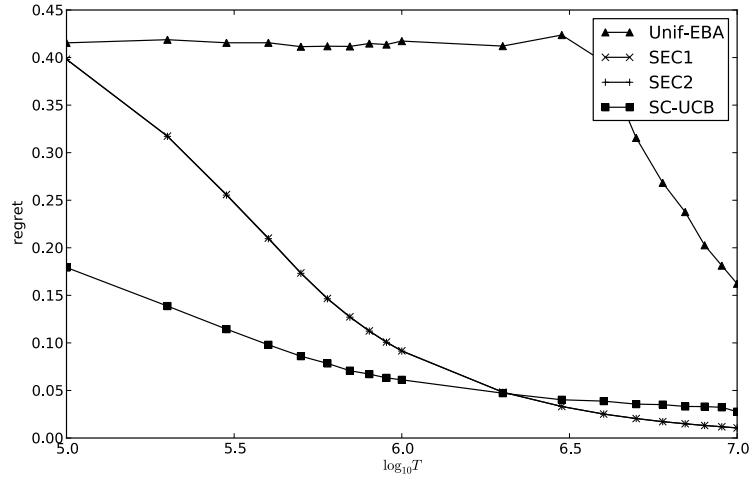

Figure 6: Numerical performances where  $K = 100$ ,  $\gamma = 0.90$ , and  $\Delta = 0.02$

- [3] S. Bubeck, R. Munos, and G. Stoltz. Pure exploration in finitely-armed and continuous-armed bandits. *Theoretical Computer Science*, 412(19):1832–1852, 2011.
- [4] W. Hoeffding. Probability inequalities for sums of bounded random variables. *Journal of the American Statistical Association*, 58(301):13–30, 1963.
- [5] T. L. Lai and H. Robbins. Asymptotically efficient adaptive allocation rules. *Advances in Applied Mathematics*, 6:4–22, 1985.
- [6] S. Mannor and J. Tsitsiklis. The sample complexity of exploration in the multi-armed bandit problem. *Journal of Machine Learning Research*, 5:623–648, 2004.
