# Supplementary material
Source: ML conference proceedings conference paper supplement (https://proceedings.neurips.cc/paper_files/paper/2011/hash/d56b9fc4b0f1be8871f5e1c40c0067e7-Abstract.html)
Supplement: Supplementary file 2 [file d56b9fc4b0f1be8871f5e1c40c0067e7-Supplemental.zip]

Archive with 1 entries (1 files):
- all/Paper 893/mab_sup_nips_cr.pdf
